# Supplementary material
Source: PubMed Central journal article supplement (PMC4734806)
Supplement: supp_fj.14-258947_Supplemental_Figure1.pdf [file supp_fj.14-258947_Supplemental_Figure1.pdf]

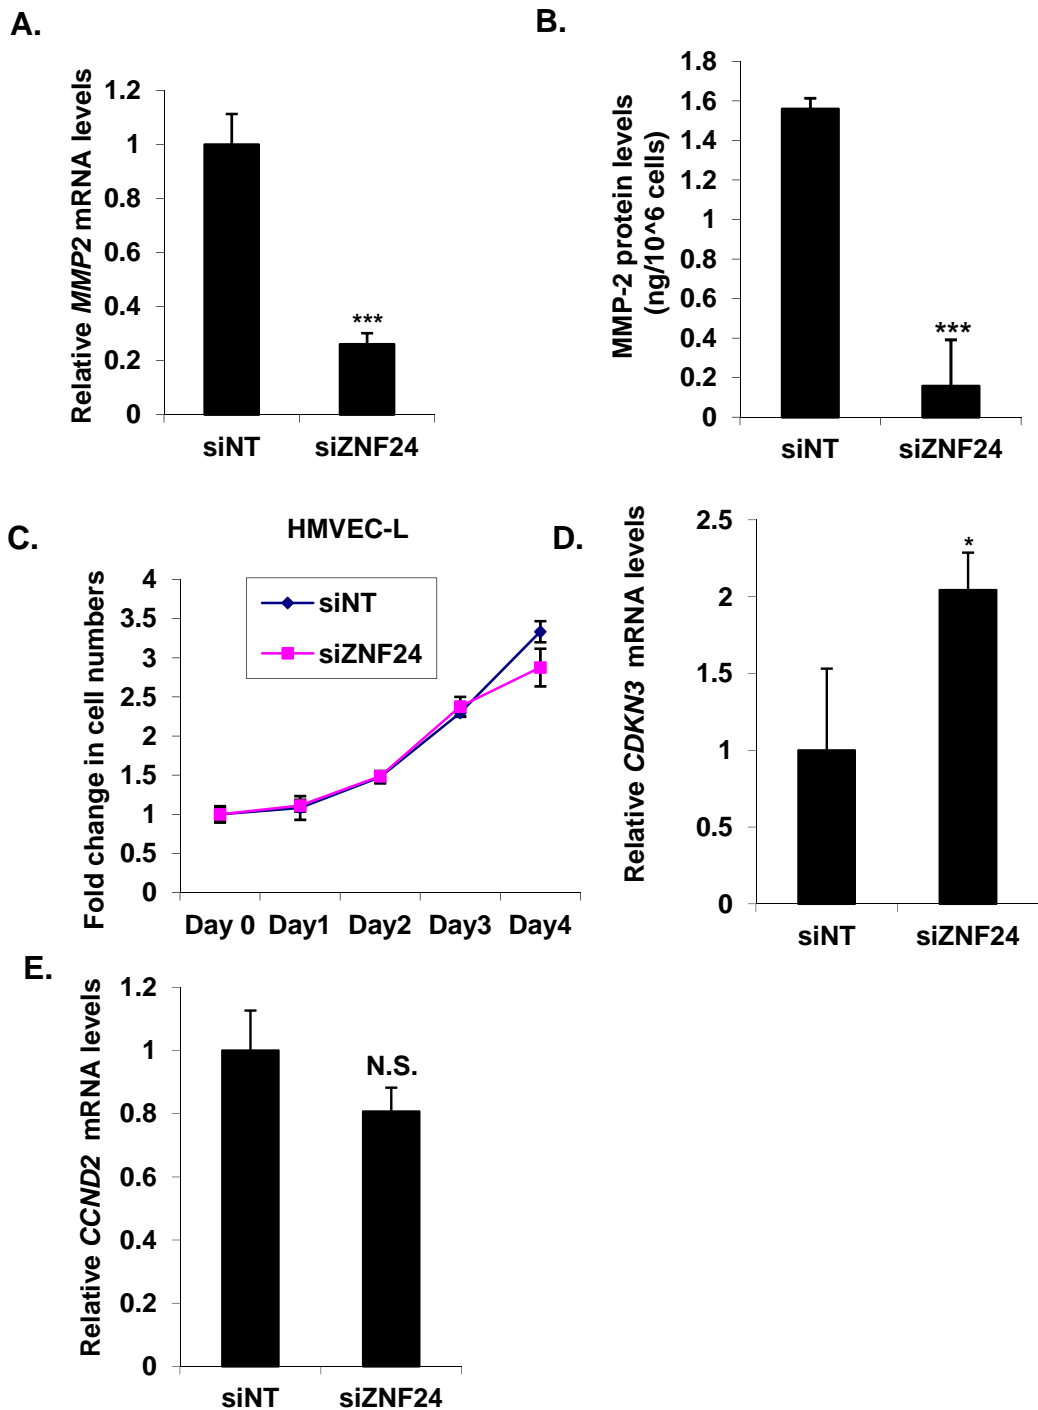

**Supplemental Figure 1. Effects of ZNF24 knockdown on HMVEC-L cell gene expression and proliferation.** (A, B) HMVEC-L cells were transfected with control siRNA or siZNF24. mRNA levels (A) and protein levels (B) of MMP-2 were analyzed by quantitative PCR and ELISA, respectively. \*\*\*:  $P < 0.001$ . Values in all graphs represent mean  $\pm$  SD from 3 independent experiments. (C) HMVEC-L cells were transfected with control siRNA or siZNF24, and cell numbers were counted daily. (D, E) HMVEC-L cells were transfected with control siRNA or siZNF24, and mRNA levels of *CDKN3* (D) and *CCND2* (E) were analyzed by quantitative PCR. \*:  $P < 0.05$ ; N.S.: not significant. Values in all graphs represent mean  $\pm$  SD from 3 independent experiments.
