# Supplementary material
Source: PubMed Central journal article supplement (PMC4734806)
Supplement: supp_fj.14-258947_Supplemental_Figure2.pdf [file supp_fj.14-258947_Supplemental_Figure2.pdf]

A.

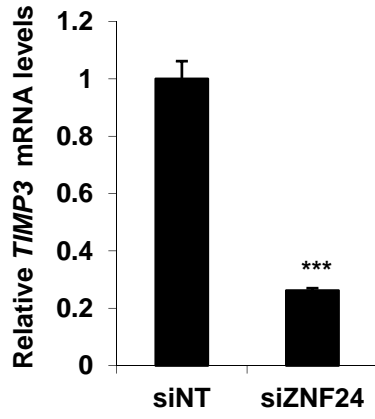

B.

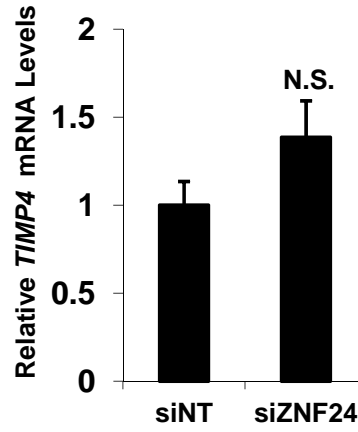

**Supplemental Figure 2. Knockdown of *ZNF24* leads to significantly decreased mRNA levels of *TIMP3* but not *TIMP4*.** HMVEC-D cells were transfected with control siRNA or siZNF24, and mRNA levels of *TIMP3* (A) and *TIMP4* (B) were analyzed by quantitative PCR. \*\*\*:  $P < 0.001$ ; N.S.: not significant. Values in all graphs represent mean  $\pm$  SD from 3 independent experiments.
