# Supplementary material
Source: PubMed Central journal article supplement (PMC4734806)
Supplement: supp_fj.14-258947_Supplemental_Figure3.pdf [file supp_fj.14-258947_Supplemental_Figure3.pdf]

A.

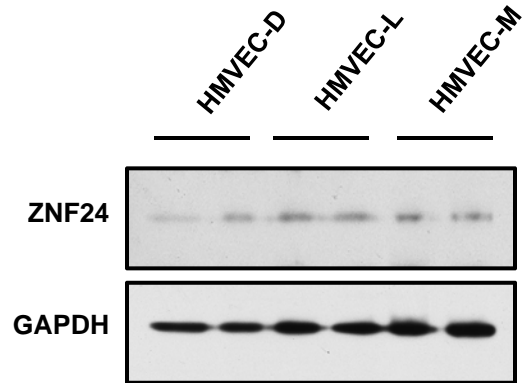

B.

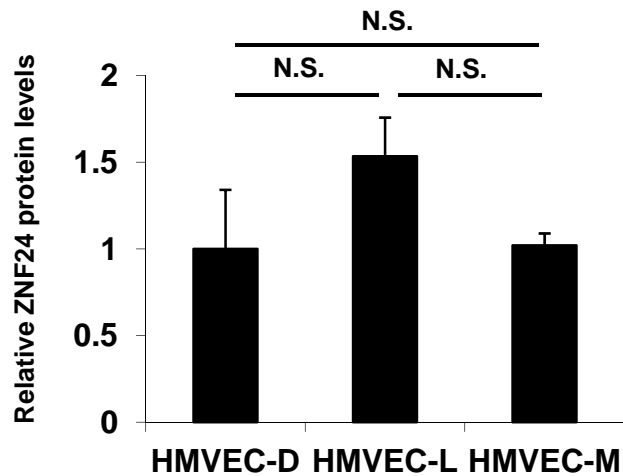

**Supplemental Figure 3. Endogenous ZNF24 protein levels do not exhibit significant differences among HMVEC-D, HMVEC-L and HMVEC-M cells.**

Endogenous ZNF24 and GAPDH levels in HMVEC-D, HMVEC-L and HMVEC-M cells were analyzed by immunoblotting (A) and quantified by densitometry using Photoshop CS5 (B). N.S.: not significant
