# Supplementary material
Source: PubMed Central journal article supplement (PMC4734806)
Supplement: supp_fj.14-258947_Supplemental_Table1.pdf [file supp_fj.14-258947_Supplemental_Table1.pdf]

**A.**

| <b>Genes upregulated by siZNF24</b>   | <b>Fold Change</b> |
|---------------------------------------|--------------------|
| BRCA2                                 | 4.68               |
| CCNB1                                 | 4.06               |
| CDC20                                 | 4.06               |
| GTSE1                                 | 3.92               |
| MKI67*                                | 3.69               |
| CKS2*                                 | 3.51               |
| CDKN3*                                | 3.34               |
| CKS1B*                                | 3.32               |
| AURKB                                 | 3.31               |
| CDC25C                                | 3.30               |
| MAD2L1                                | 3.29               |
| CCNB2                                 | 3.17               |
| CDK1*                                 | 3.13               |
| CHEK1                                 | 3.03               |
| CDC6                                  | 3.02               |
| BIRC5                                 | 2.97               |
| CCNA2                                 | 2.92               |
| BRCA1                                 | 2.73               |
| AURKA                                 | 2.69               |
| MCM2                                  | 2.41               |
| RBL1                                  | 2.36               |
| MCM5                                  | 2.19               |
| MCM4                                  | 2.11               |
| TFDP1                                 | 2.06               |
| <b>Genes downregulated by siZNF24</b> | <b>Fold Change</b> |
| CCND2*                                | -2.25              |
| CASP3                                 | -2.18              |
| CDKN1B                                | -2.10              |

**B.**

| <b>Genes upregulated by siZNF24</b>   | <b>Fold Change</b> |
|---------------------------------------|--------------------|
| FOSL1                                 | 5.72               |
| RUNX1                                 | 3.24               |
| CD44                                  | 2.61               |
| STIL                                  | 2.43               |
| <b>Genes downregulated by siZNF24</b> | <b>Fold Change</b> |
| LRP5                                  | -4.32              |
| DLL4                                  | -3.68              |
| PSEN2                                 | -3.66              |
| SMO                                   | -3.21              |
| JAG2                                  | -3.09              |
| DLL3                                  | -2.70              |
| WNT11                                 | -2.68              |
| JAG1                                  | -2.66              |
| HEY1                                  | -2.51              |
| LMO2                                  | -2.49              |
| HES1                                  | -2.47              |
| GLI1                                  | -2.43              |
| HR                                    | -2.24              |
| HES5                                  | -2.16              |
| ADAM10                                | -2.15              |
| PPARG                                 | -2.10              |

**Supplemental Table 1. Genes that are differentially expressed in HMVEC-D cells transfected with siZNF24 compared to those transfected with control siRNA.**

HMVEC-D cells were transfected with siNT or siZNF24, and mRNA levels of cell cycle-regulatory genes (A) and genes involved in the Notch signaling pathway (B) were analyzed by qPCR arrays. Genes that exhibited changes of two fold or more are shown. \*: These genes were also differentially expressed in mammary epithelial cells transfected with siZNF24 compared to those transfected with control siRNA.
